# Supplementary material
Source: PubMed Central journal article supplement (PMC5450345)
Supplement: jnm176206SupplementaryData.pdf [file jnm176206SupplementaryData.pdf]

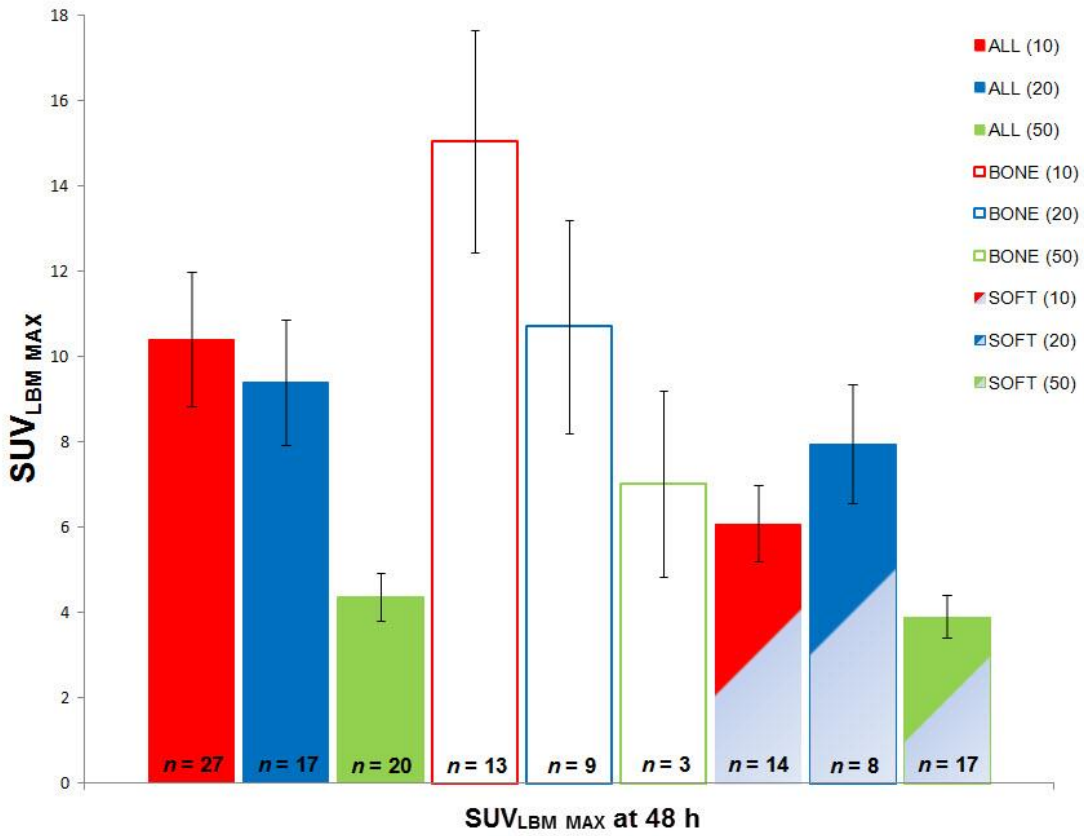

**SUPPLEMENTAL FIGURE 1.** Lesion uptake and level of mass.

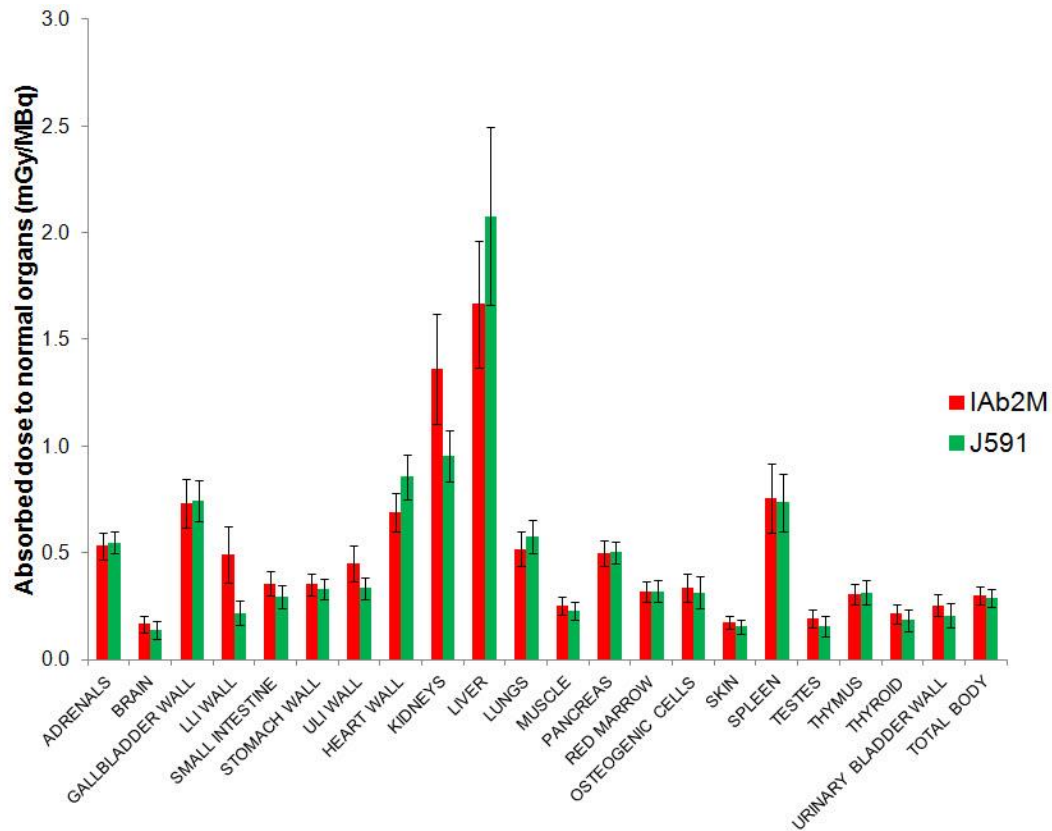

**SUPPLEMENTAL FIGURE 2.** Dosimetry of  $^{89}\text{Zr}$ -IAB2M vs.  $^{89}\text{Zr}$ -J591.

**SUPPLEMENTAL TABLE 1.** Patient demographics

| Characteristic (n = 18 pts)   | No. (%) or median (range) |
|-------------------------------|---------------------------|
| Age                           | 68 (53-86)                |
| Gleason score                 | 7 (6-9)                   |
| KPS, %                        | 90 (70-90)                |
| No. prior hormonal therapies  | 2 (0-5)                   |
| Prior chemotherapy            | 2 (11.1%)                 |
| PSA, ng/mL                    | 14.69 (0.22-153)          |
| LDH, units/L                  | 216 (163-526)             |
| Alkaline phosphatase, units/L | 80 (26-231)               |
| Albumin, g/dL                 | 4.4 (3.7-5)               |
| Hemoglobin, g/dL              | 13.6 (9.7-16.3)           |

|                      |            |
|----------------------|------------|
| Disease burden       |            |
| Bone only            | 3 (16.67%) |
| Soft tissue only     | 8 (44.44%) |
| Bone and soft tissue | 7 (38.89%) |
